# Supplementary material for: Phage Orf Family Recombinases: Conservation of Activities and Involvement of the Central Channel in DNA Binding
Source: PubMed Central journal article supplement (PMC4118853; doi:10.1371/journal.pone.0102454), 2014-08-01
Supplement: pone.0102454.s007.pdf [file pone.0102454.s007.pdf]

**Table S1.** Representative Orf family proteins

| Accession  | Length | Source                                                         | Identity (%) |
|------------|--------|----------------------------------------------------------------|--------------|
| AAA96587   | 146    | Bacteriophage $\lambda$                                        | 100          |
| AAN80023   | 146    | <i>Escherichia coli</i> CFT073 (Uropathogenic <i>E. coli</i> ) | 99           |
| CAC95061   | 146    | <i>Escherichia coli</i> O84:H <sup>-</sup> phage Lahn3         | 98           |
| AAF31136   | 146    | Enterobacteria phage HK97                                      | 98           |
| AAW70535   | 145    | <i>Salmonella enterica</i> Typhimurium phage ES18              | 97           |
| BAD15193   | 145    | <i>Salmonella enterica</i> Typhimurium phage ST104             | 96           |
| NP597901   | 146    | Enterobacteria phage HK022                                     | 95           |
| AAF75030   | 145    | Enterobacteria phage P22                                       | 95           |
| AAQ12239   | 146    | <i>Shigella flexneri</i> phage Sf6                             | 94           |
| CAL20725   | 142    | <i>Yersinia pestis</i> CO92                                    | 55           |
| AAM85783   | 148    | <i>Yersinia pestis</i> KIM                                     | 54           |
| AAS46709   | 146    | <i>Aeromonas hydrophila</i>                                    | 52           |
| ZP00208985 | 138    | <i>Magnetospirillum magnetotacticum</i> MS-1                   | 48           |
| AAL15506   | 101    | <i>Salmonella typhimurium</i> phage ST64T (truncated)          | 44           |
| CAB39290   | 111    | <i>Escherichia coli</i> O157:H7 phage 933W (truncated)         | 44           |
| CAJ26398   | 138    | <i>Escherichia coli</i> O84:H <sup>-</sup> phage Lahn2         | 44           |
| AAY37846   | 132    | <i>Pseudomonas syringae</i> B728a                              | 43           |
| BAA84314   | 181    | <i>Escherichia coli</i> O157:H7 Stx2-converting phage VT2-Sa   | 42           |
| BAC77948   | 181    | <i>Escherichia coli</i> O157:H7 Stx1-converting phage          | 42           |
| CAD88833   | 181    | <i>Escherichia coli</i> O84:H <sup>-</sup> phage BP-4795       | 42           |
| BAB34618   | 148    | <i>Escherichia coli</i> O157:H7 (ECs1195)                      | 42           |
| BAB36405   | 148    | <i>Escherichia coli</i> O157:H7 (ECs2982)                      | 42           |
| AAG57234   | 148    | <i>Escherichia coli</i> O157:H7 EDL933 prophage CP-933V        | 42           |
| CAC95070   | 148    | <i>Escherichia coli</i> O84:H <sup>-</sup> phage Lahn1         | 42           |
| CAC83141   | 181    | <i>Escherichia coli</i> 1639/77 phage CP-1639                  | 41           |
| AAV78288   | 148    | <i>Salmonella enterica</i> Paratyphi A strain ATCC9150         | 41           |
| CAC95094   | 181    | <i>Escherichia coli</i> O157:H7 phage Nil2                     | 41           |
| AAK28875   | 136    | <i>Escherichia coli</i> H phage HK620                          | 37           |
| CAE32701   | 135    | <i>Bordetella bronchiseptica</i> RB50 (BB2204)                 | 34           |
| ZP00156617 | 138    | <i>Haemophilus influenzae</i> R2866                            | 34           |
| AAX88515   | 138    | <i>Haemophilus influenzae</i> 86-028NP                         | 33           |
| CAD90796   | 165    | <i>Actinobacillus actinomycetemcomitans</i> phage Aaf23        | 32           |
| ABD27460   | 124    | <i>Novosphingobium aromaticivorans</i> DSM 12444               | 30           |
| AAW89770   | 127    | <i>Neisseria gonorrhoeae</i> FA 1090                           | 29           |
| EAM26711   | 136    | <i>Burkholderia vietnamiensis</i> G4                           | 28           |
| CAE34008   | 151    | <i>Bordetella bronchiseptica</i> RB50 (BB3514)                 | 25           |
| CAC96971   | 186    | <i>Listeria innocua</i> Clip11262 (lin1740)                    | 18           |
| CAC96489   | 184    | <i>Listeria innocua</i> Clip11262 (lin1258)                    | 18           |
| AAZ89087   | 151    | <i>Shigella sonnei</i> Ss046                                   | 17           |
| CAE15288   | 147    | <i>Photorhabdus luminescens</i> TTO1                           | 16           |
| AAG55969   | 151    | <i>Escherichia coli</i> O157:H7 EDL933 (phage CP-933X)         | 16           |
| CAA63327   | 151    | <i>Escherichia coli</i> phage 82                               | 16           |

*S. enterica* serovar Typhimurium phage ST64T and *E. coli* O157:H7 phage 933W were excluded from the phylogenetic tree (Figure S1) because they carry incomplete *orf* genes. Similarly, *L. innocua* Clip11262 (lin1740) was omitted because it differs from lin1258 at only eight positions.
