# Supplementary material for: Phage Orf Family Recombinases: Conservation of Activities and Involvement of the Central Channel in DNA Binding
Source: PubMed Central journal article supplement (PMC4118853; doi:10.1371/journal.pone.0102454), 2014-08-01
Supplement: pone.0102454.s008.pdf [file pone.0102454.s008.pdf]

**Table S2.** Secondary structure predictions for YbcN and Orf mutant proteins from CD data.

|                        | $\alpha$ -helix | $\beta$ -sheet | Turn | Coil |
|------------------------|-----------------|----------------|------|------|
| MBP <sup>a</sup>       | 45              | 28             | 12   | 15   |
| GST <sup>a</sup>       | 50              | 7              | 13   | 29   |
| MBP-Orf <sup>a,b</sup> | 46              | 27             | 11   | 16   |
| MBP                    | 31              | 21             | 19   | 31   |
| MBP-YbcN               | 42              | 12             | 16   | 31   |
| GST                    | 20              | 29             | 21   | 30   |
| GST-YbcN               | 17              | 33             | 21   | 29   |
| MBP-Orf                | 38              | 16             | 15   | 31   |
| Q45A                   | 36              | 13             | 21   | 31   |
| K48A                   | 49              | 9              | 12   | 30   |
| W50A                   | 40              | 10             | 20   | 31   |
| R103E                  | 39              | 14             | 16   | 30   |
| V106E                  | 39              | 17             | 15   | 29   |
| W137A                  | 42              | 15             | 15   | 29   |

Comparison of MBP-Orf secondary structures as determined by analysis of the known crystal structures<sup>a</sup> of MBP, GST and Orf (PDB codes: 1fqa, 1m99 and 1pc6, respectively) and deconvolution of the CD data. In the case of MBP-Orf<sup>b</sup> the statistics for 1fqa and 1pc6 were combined. CD spectra for each protein were analyzed using the CDSSTR, ContinLL and Selcon3 programs from the CDPro suite. The ContinLL provided the best fit and percentage data for this method are shown.
