# Supplementary material for: Phage Orf Family Recombinases: Conservation of Activities and Involvement of the Central Channel in DNA Binding
Source: PubMed Central journal article supplement (PMC4118853; doi:10.1371/journal.pone.0102454), 2014-08-01
Supplement: pone.0102454.s009.pdf [file pone.0102454.s009.pdf]

**Table S3.** Static light scattering analysis of MBP-Orf mutants.

|         | <b>Z-average</b> | <b>Pd Index</b> | <b>% Pd</b> | <b>r (nM)</b> | <b>kDa</b>     |
|---------|------------------|-----------------|-------------|---------------|----------------|
| MBP     | 22.68 ±12.18     | 0.288           | 26.7        | 17.88 ±4.770  | 2290 ±764.8    |
| MBP-Orf | 43.88 ±0.747     | 0.548           | 12.2        | 6.11 ±0.747   | 212.3 ±79.8    |
| Q45A    | 20.30 ±18.86     | 0.863           | 12.0        | 5.80 ±0.694   | 190.6 ±24.6    |
| K48A    | 45.28 ±35.78     | 0.623           | 10.6        | 5.48 ±0.579   | 171.0 ±52.0    |
| W50A    | 17.12 ±17.12     | 1.000           | 16.1        | 5.82 ±0.937   | 190.6 ±45.3    |
| R103E   | 6.21 ±4.219      | 0.462           | 15.2        | 5.24 ±0.798   | 153.5 ±34.3    |
| V106E   | 72.60 ±48.52     | 0.447           | 55.8        | 114.90 ±64.15 | 139000 ±124000 |
| W137A   | 58.53 ±41.22     | 0.496           | 7.0         | 5.91 ±0.415   | 212.0 ±87.4    |

MBP and MBP-Orf proteins at 0.2 mg/ml in 100 mM Tris-HCl pH7 at 25°C were analyzed in a Zetasizer  $\mu$ V. The polydispersity (Pd) index for each sample and the percentage for the predominant MBP-Orf peak are shown. Standard deviations of the duplicate data sets are shown.
