# Supplementary material for: Phage Orf Family Recombinases: Conservation of Activities and Involvement of the Central Channel in DNA Binding
Source: PubMed Central journal article supplement (PMC4118853; doi:10.1371/journal.pone.0102454), 2014-08-01
Supplement: pone.0102454.s010.pdf [file pone.0102454.s010.pdf]

**Table S4.** Oligonucleotides used to generate DNA substrates.

| Oligo               | Nucleotide sequence (5'-3')                                              |
|---------------------|--------------------------------------------------------------------------|
| o-SS <sub>50</sub>  | GGCGACGTGATCACCAGATGATTGCTAGGCATGCTTTCCGCAAGAGAAGC                       |
| o-DS <sub>50</sub>  | GCTTCTCTTGCGGAAAGCATGCCTAGCAATCATCTGGTGATCACGTGCGC                       |
| o-SS <sub>60</sub>  | TTTGGTCTAACTTTACCGCTACTAAATGCCGCGGATTGGTTTTGCTGAATCAGGTTATTA             |
| o-DS <sub>60</sub>  | TAATAACCTGATTCAGCGAAACCAATCCGCGGCATTTAGTAGCGGTAAAGTTAGACCAAA             |
| o-MM <sub>G:G</sub> | TAATAACCTGATTCAGCGAAACCAATC <u>G</u> GCGGCATTTAGTAGCGGTAAAGTTAGACCAAA    |
| o-MM <sub>T:G</sub> | TAATAACCTGATTCAGCGAAACCAATC <u>T</u> GCGGCATTTAGTAGCGGTAAAGTTAGACCAAA    |
| o-BB <sub>5</sub>   | TAATAACCTGATTCAGCGAAACCAATC <u>GCAACC</u> ATTTAGTAGCGGTAAAGTTAGACCAAA    |
| o-BB <sub>13</sub>  | TAATAACCTGATTCAGCGAAAC <u>ATTGTAGGTAAGCT</u> TAGTAGCGGTAAAGTTAGACCAAA    |
| o-BB <sub>20</sub>  | TAATAACCTGATTCAGCGAAT <u>GACCGATAACGTCCACTTG</u> AGCGGTAAAGTTAGACCAAA    |
| o-BT <sub>1</sub>   | TAATAACCTGATTCAGCGAAACCAATCC <u>A</u> GCGGCATTTAGTAGCGGTAAAGTTAGACCAAA   |
| o-BT <sub>2</sub>   | TAATAACCTGATTCAGCGAAACCAATCC <u>AA</u> GCGGCATTTAGTAGCGGTAAAGTTAGACCAAA  |
| o-BT <sub>3</sub>   | TAATAACCTGATTCAGCGAAACCAATCC <u>AAA</u> GCGGCATTTAGTAGCGGTAAAGTTAGACCAAA |

Nucleotides underlined in o-MM<sub>G:G</sub>, o-MM<sub>T:G</sub>, o-BB<sub>5</sub>, o-BB<sub>13</sub> and o-BB<sub>20</sub> highlight sequences that differ from o-SS<sub>60</sub> and generate mismatch or bubble structures when annealed. Similarly, underlined nucleotides in o-BT<sub>1</sub> to o-BT<sub>3</sub> indicate sequences that generate insertions when annealed to o-SS<sub>60</sub>.
